# Supplementary material for: Comparable Liraglutide Pharmacokinetics in Pediatric and Adult Populations with Type 2 Diabetes: A Population Pharmacokinetic Analysis
Source: Springer Nature journal article supplement (doi:10.1007/s40262-014-0229-z), 2015-01-20
Supplement: MOESM1 [file 9340940]

## **Electronic Supplemental Material (Online Resource)**

Journal: *Clinical Pharmacokinetics*

### **Comparable liraglutide pharmacokinetics in pediatric and adult populations with type 2 diabetes: a population pharmacokinetic analysis**

Kristin C. Carlsson Petri<sup>1</sup>, Lisbeth V. Jacobsen<sup>1</sup>, David J. Klein<sup>2</sup>

<sup>1</sup>Novo Nordisk A/S, Søborg, Denmark

<sup>2</sup>Medpace, Cincinnati, OH, USA

Correspondence: Kristin C. Carlsson Petri, Quantitative Clinical Pharmacology, Novo Nordisk A/S, 108-110 Vandtårnsvej, Søborg, DK-2860, Denmark. Tel: +45 4444 8888. Email: KCC@novonordisk.com

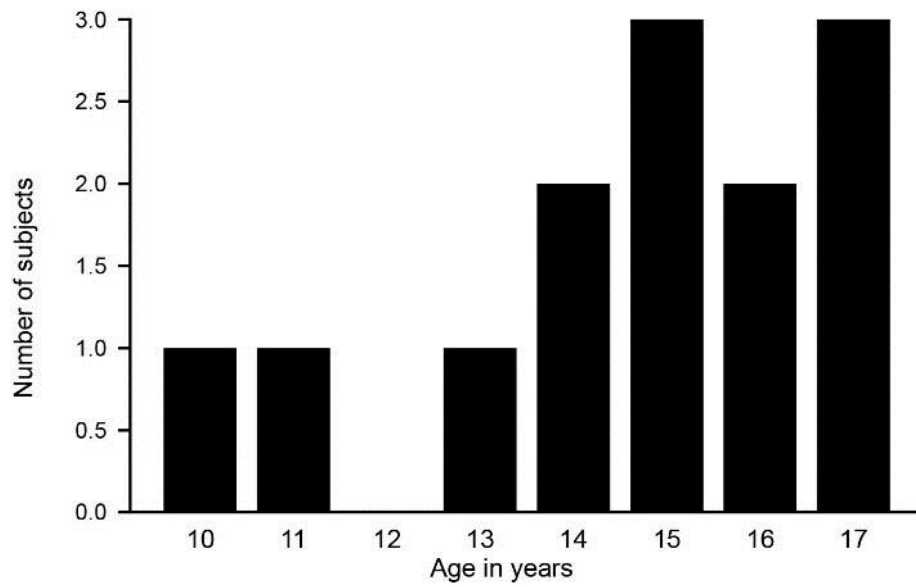

**Figure 1.** Age distribution in the pediatric population (Trial 1). X-axis: age in years. Y-axis: number of subjects.

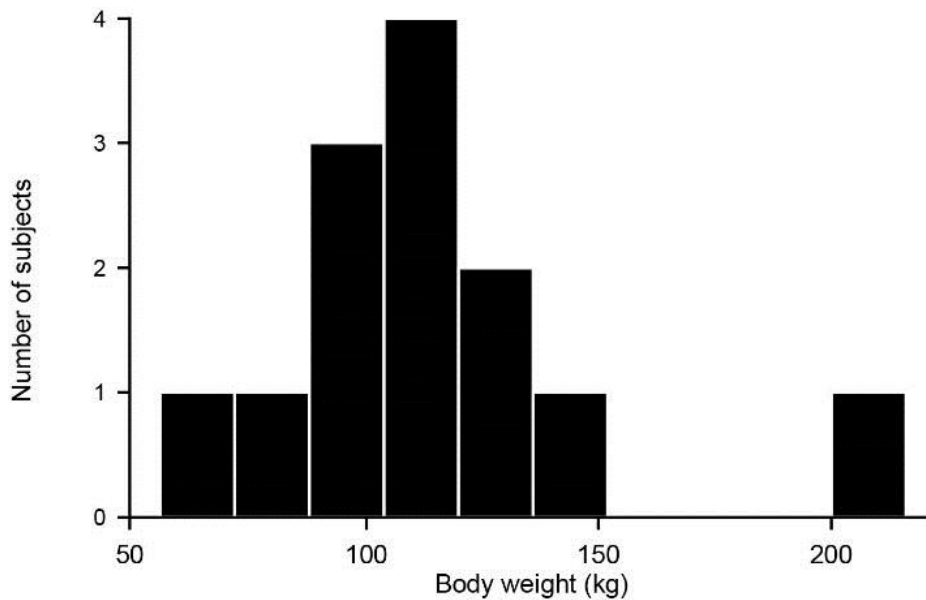

**Figure 2.** Body weight distribution in the pediatric population (Trial 1). X-axis: body weight in kg. Y-axis: number of subjects.

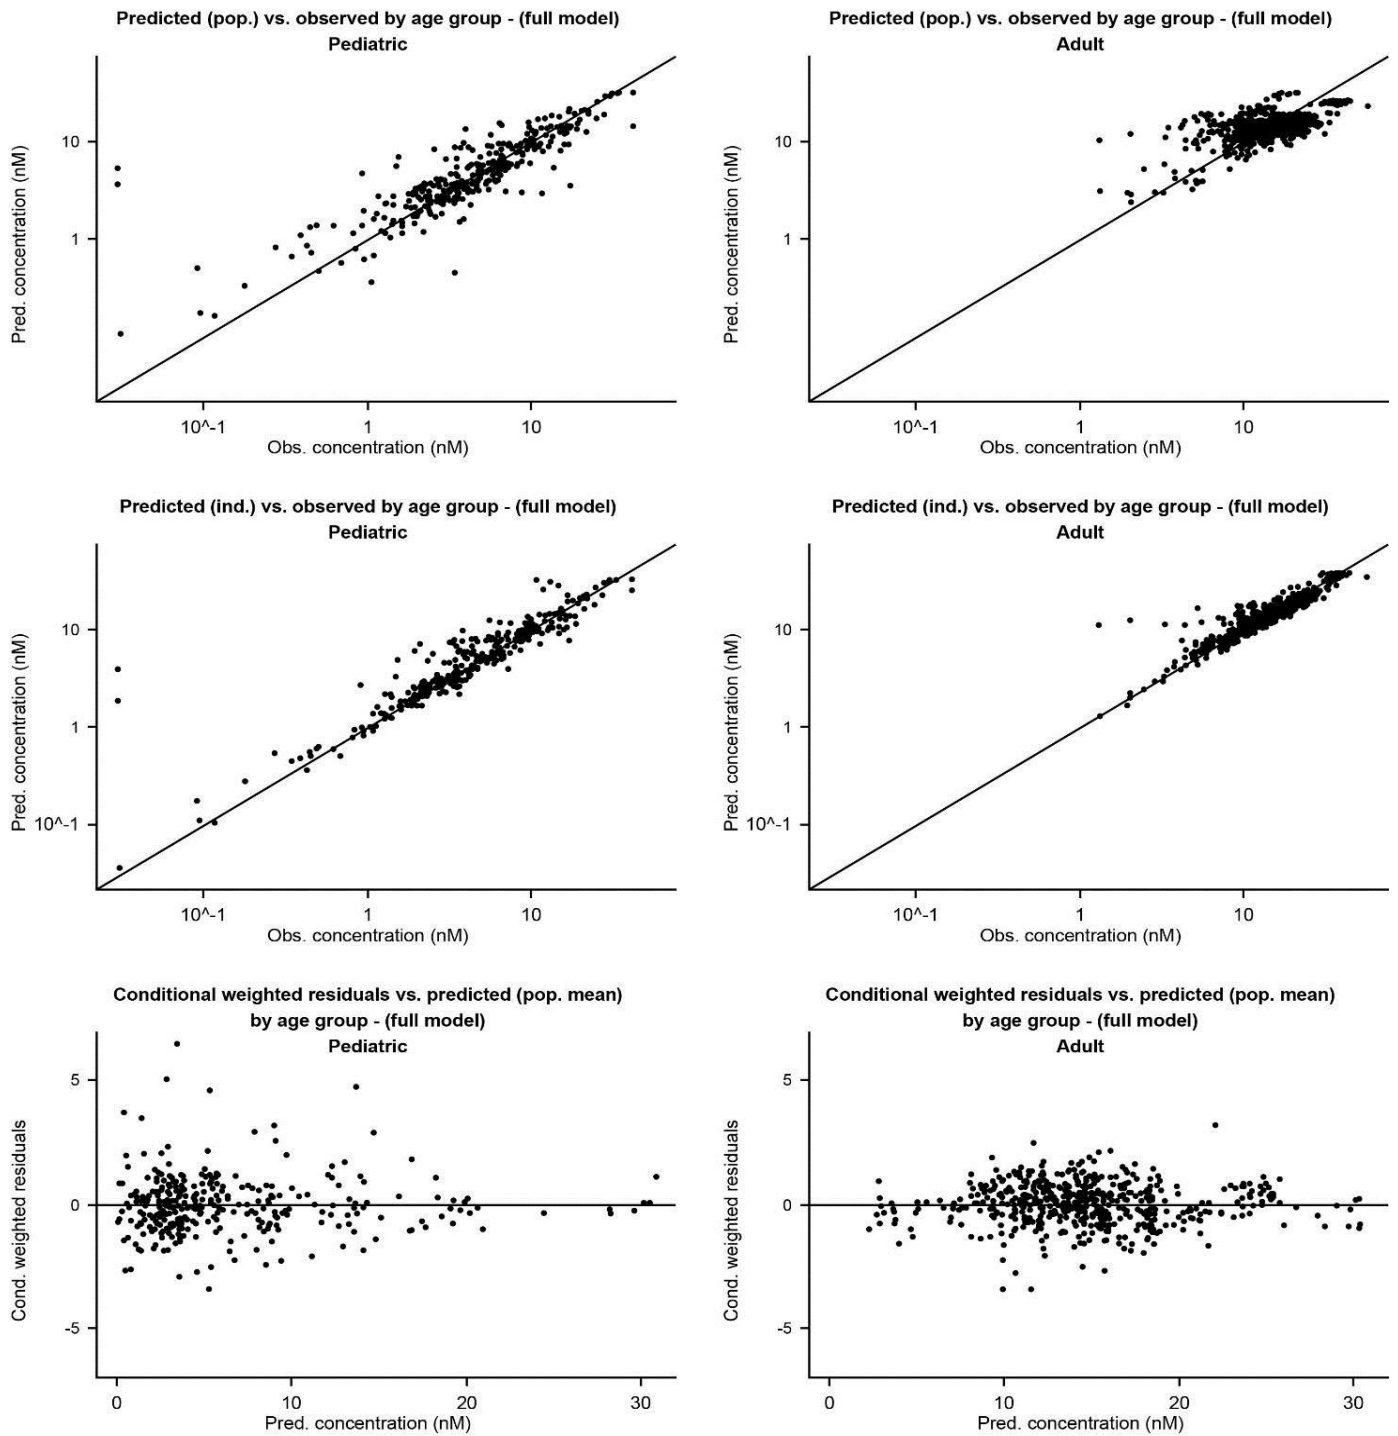

**Figure 3.** Population and individual predicted values vs. observed values and conditional weighted residuals vs. predicted values for the full model split between pediatric and adult subjects. Cond., conditional; ind., individual; Obs., observed; pop., population; Pred., predicted.

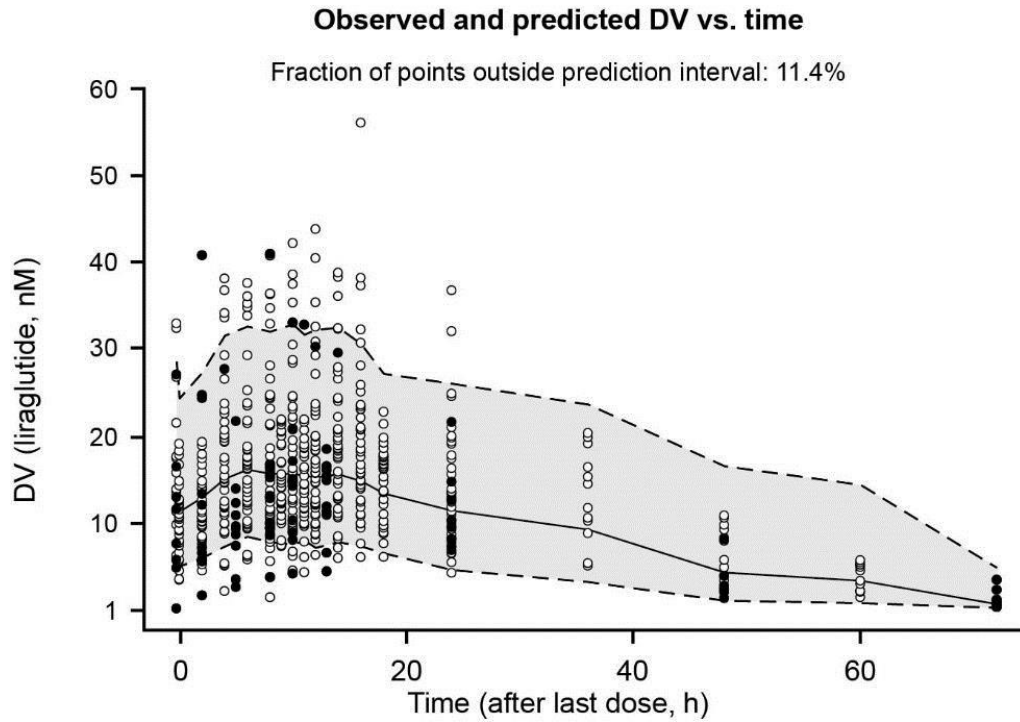

**Figure 4.** Visual predictive check for the full model. Liraglutide concentration (nM) vs. nominal time since last dose (h). Circles show the observed steady-state concentrations for subjects receiving 1.8 mg once-daily (pediatric subjects: black filled circles; adult subjects: open circles). The lines and shaded area show the median and 90% prediction interval. The observations at nominal time points at 5, 9 and 13 h have been binned with the observations at 4, 8 and 12 h, respectively, due to a low number of observations at these time points. DV, dependent variable.

**Table 1.** Parameter estimates of the full and base models

| Fixed-effects parameters  | Description                     | Unit | Full model |                     | Base model |                     |
|---------------------------|---------------------------------|------|------------|---------------------|------------|---------------------|
|                           |                                 |      | Estimate   | Uncertainty RSE (%) | Estimate   | Uncertainty RSE (%) |
| K <sub>A</sub>            | Absorption rate constant        | L/h  | 0.0657     | 6                   | 0.0657     | 7                   |
| CL/F                      | Apparent clearance              | L/h  | 1.06*      | 10                  | 1.49       | 9                   |
| V/F                       | Apparent volume of distribution | L    | 15.3       | 19                  | 18.1       | 15                  |
| F                         | Bioavailability                 | 1    | 1 (fixed)  | N/A                 | 1 (fixed)  | N/A                 |
| Cov CL-BWT                | CL body weight exponent**       | N/A  | 0.929      | 15                  | N/A        | N/A                 |
| Cov CL-Gen                | CL - gender contrast**          | N/A  | 0.365      | 29                  | N/A        | N/A                 |
| Cov CL-AGEgr              | CL- age category contrast**     | N/A  | 0.107      | 91                  | N/A        | N/A                 |
| Random-effects parameters | Description                     | Unit | Estimate   | Shrinkage (%)       | Estimate   | Shrinkage (%)       |
| CL/F (dose 1.8 mg)        | BSV in CL/F                     | % CV | 34         | 1                   | 48         | 11                  |
| Residual error parameters | Description                     | Unit | Estimate   | Shrinkage (%)       |            |                     |
| Sigma                     | Residual error (proportional)   | % CV | 23         | 7                   | 23         | 8                   |

BSV, between subject variability; CV, coefficient of variation; RSE, relative standard error.

\*Reference value corresponding to an adult female subject weighing 90 kg.

\*\*Expression for CL/F:

$$\frac{CL_i}{F} = \frac{CL}{F} * \left( \frac{BWT}{90kg} \right)^{CovCLBWT} * e^{CovCLGen \{ifmale\}} * e^{CovCLPaed \{ifpaediatric\}} * e^{(\eta_i)}$$
